# Supplementary material for: Industrial amine blends enable efficient CO electrosynthesis in reactive capture
Source: Royal Society of Chemistry journal article supplement (doi:10.1039/d5ey00333d), 2025-12-23
Supplement: d5ey00333d1.pdf [file d5ey00333d1.pdf]

## Supplementary Information

### Industrial amine blends enable efficient CO electrosynthesis in reactive capture

Siyu Sonia Sun<sup>1†</sup>, Yurou Celine Xiao<sup>1†</sup>, Feng Li<sup>1</sup>, Jinhong Wu<sup>1</sup>, Yuxuan Che<sup>1</sup>, Yong Wang<sup>1</sup>, Min Liu<sup>1</sup>, Yaohao Guo<sup>1</sup>, Mengyang Fan<sup>1</sup>, Kai Han<sup>2</sup>, Paul-Emmanuel Just<sup>2</sup>, Paul J. Corbett<sup>2</sup>, Rui Kai Miao<sup>1\*</sup>, David Sinton<sup>1\*</sup>

<sup>1</sup>*Department of Mechanical and Industrial Engineering, University of Toronto, Ontario, Canada*

<sup>2</sup>*Shell Global Solutions International B.V., Grasweg 31, 1031HW Amsterdam, the Netherlands*

*\*Corresponding author. Email: [sinton@mie.utoronto.ca](mailto:sinton@mie.utoronto.ca), [ruikai.miao@mail.utoronto.ca](mailto:ruikai.miao@mail.utoronto.ca)*

*†These authors contributed equally to this work.*

## COMSOL simulations

We simulated  $\text{CO}_2$  distributions on the cathode surface in 1D with COMSOL Multiphysics package based on the finite-element-method solver. The  $\text{HCO}_3^-$  concentration was set to the range of 0.1 M to 1.8 M, simulating different amine blends as catholyte. The flux of  $\text{H}^+$  was set on the membrane boundary according to the applied reaction current.

The concentrations of  $\text{CO}_2(\text{aq})$ ,  $\text{CO}_3^{2-}$ ,  $\text{HCO}_3^-$  and pH were calculated using the following homogeneous reactions:

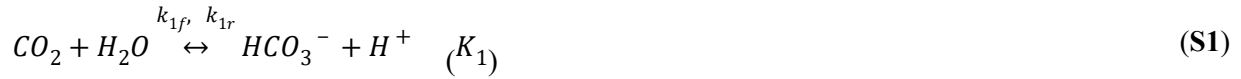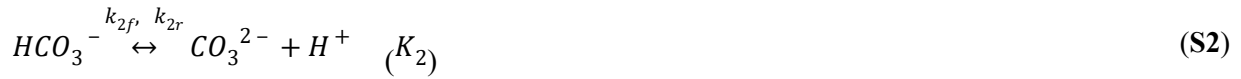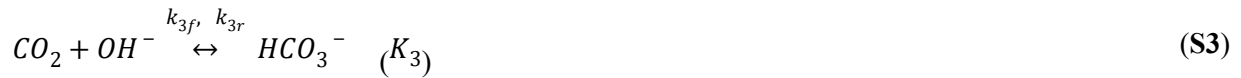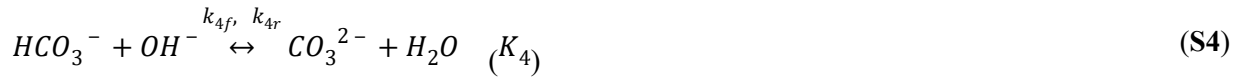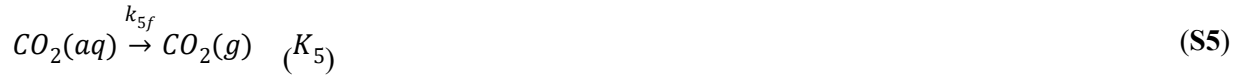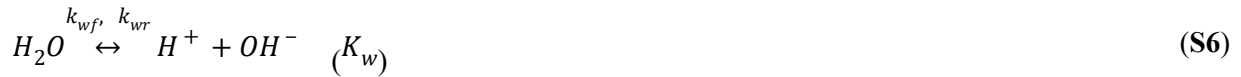

The following equations were the electrochemical reactions on the cathode surface:

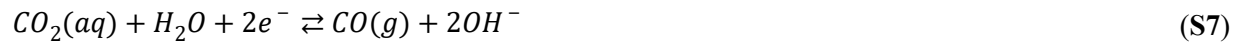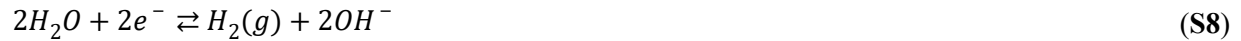

The rate of each species  $R_i$  was broken into carbonate equilibria as follows:

$$R_{\text{CO}_2} = (-[\text{CO}_2]_{\text{aq}}[\text{H}_2\text{O}]k_{1f} + [\text{H}^+][\text{HCO}_3^-]k_{1r}) + (-[\text{CO}_2]_{\text{aq}}[\text{OH}^-]k_{3f} + [\text{HCO}_3^-]k_{3r}) \quad (\text{S9})$$

$$R_{\text{CO}_3^{2-}} = ([\text{HCO}_3^-]k_{2f} - [\text{H}^+][\text{CO}_3^{2-}]k_{2r}) + ([\text{HCO}_3^-][\text{OH}^-]k_{4f} - [\text{H}_2\text{O}][\text{CO}_3^{2-}]k_{4r}) \quad (\text{S10})$$

$$R_{HCO_3^-} = ([CO_2]_{aq}[H_2O]k_{1f} - [H^+][HCO_3^-]k_{1r}) + (-[HCO_3^-][OH^-]k_{4f} + [H_2O][CO_3^{2-}]k_{4r}) \quad (S11)$$

$$R_{H^+} = ([CO_2]_{aq}[H_2O]k_{1f} - [H^+][HCO_3^-]k_{1r}) + ([HCO_3^-][OH^-]k_{4f} - [H_2O][CO_3^{2-}]k_{4r}) \quad (S12)$$

$$R_{OH^-} = (-[CO_2]_{aq}[OH^-]k_{3f} + [HCO_3^-]k_{3r}) + (-[HCO_3^-][OH^-]k_{4f} + [H_2O][CO_3^{2-}]k_{4r}) \quad (S13)$$

The phase transform rates from aqueous CO<sub>2</sub> to gaseous CO<sub>2</sub> ( $R_{PT,CO_2}$ ) were calculated via:

$$R_{PT,CO_2} = K_6^f (C_{CO_2}^0 - C_{CO_2}^f) \text{ if } C_{CO_2}^0 < C_{CO_2}^f \quad (S14)$$

The values of the rate constants for reactions S1-S6 are given in **Supplementary Table 3**.

The CO<sub>2</sub> saturation concentration was calculated using Henry's law:

$$C_{CO_2,aq}^0 = K_H^0 C_{CO_2,g} \quad (S15)$$

where  $K_H^0$  is Henry's constant and was given as a function of temperature  $T$ :

$$\ln K_H^0 = 93.2417 * \left(\frac{100}{T}\right) - 60.2409 + 23.3585 * \ln\left(\frac{T}{100}\right) \quad (S16)$$

where  $T$  was assumed to be 298.15 K in this study.

The saturated concentration of CO<sub>2</sub> in an electrolyte was giving by the following equation:

$$\log\left(\frac{C_{CO_2,aq}^0}{C_{CO_2,aq}}\right) = K_S C_S \quad (S17)$$

where  $C_S$  was the molar concentration of the electrolyte, and  $K_S$  was the Sechenov's constant that were calculated using the following equations:

$$K_S = \sum (h_{CO_2} + h_{ion}) \quad (S18)$$

$$h_{CO_2} = h_{CO_2}^0 + h_{CO_2}^T(T - 298.15) \quad (S19)$$

Values of  $h$  for all species can be found in **Supplementary Table 4**.

**Supplementary Table 1** | Diffusion coefficients in  $m^2s^{-1}$ .

| Constant        | Value                  | References |
|-----------------|------------------------|------------|
| $D_{H^+}$       | $9.311 \times 10^{-9}$ | (1)        |
| $D_{K^+}$       | $1.957 \times 10^{-9}$ | (1)        |
| $D_{OH^-}$      | $5.273 \times 10^{-9}$ | (1)        |
| $D_{CO_2}$      | $1.91 \times 10^{-9}$  | (1)        |
| $D_{HCO_3^-}$   | $1.185 \times 10^{-9}$ | (1)        |
| $D_{CO_3^{2-}}$ | $0.923 \times 10^{-9}$ | (1)        |

**Supplementary Table 2** | Solvation sizes in  $m$ .

| Constant        | Value                  | References |
|-----------------|------------------------|------------|
| $a_{H^+}$       | $0.56 \times 10^{-9}$  | (1)        |
| $a_{K^+}$       | $0.662 \times 10^{-9}$ | (1)        |
| $a_{OH^-}$      | $0.6 \times 10^{-9}$   | (1)        |
| $a_{CO_2}$      | $0.23 \times 10^{-9}$  | (1)        |
| $a_{HCO_3^-}$   | $0.8 \times 10^{-9}$   | (1)        |
| $a_{CO_3^{2-}}$ | $0.788 \times 10^{-9}$ | (1)        |

**Supplementary Table 3** | Rate constants used for modelling.

| Constant | Value                 | Units    | References |
|----------|-----------------------|----------|------------|
| $k_{1f}$ | $3.71 \times 10^{-2}$ | $s^{-1}$ | (1)        |
| $k_{1r}$ | $1.99 \times 10^4$    | $s^{-1}$ | (1)        |
| $k_{2f}$ | 59.99                 | $s^{-1}$ | (1)        |

|          |                       |                     |     |
|----------|-----------------------|---------------------|-----|
| $k_{2r}$ | $2.28 \times 10^7$    | $mol^{-1}m^3s^{-1}$ | (1) |
| $k_{3f}$ | 2.23                  | $mol^{-1}m^3s^{-1}$ | (1) |
| $k_{3r}$ | $5.23 \times 10^5$    | $s^{-1}$            | (1) |
| $k_{4f}$ | $6.0 \times 10^6$     | $mol^{-1}m^3s^{-1}$ | (1) |
| $k_{4r}$ | $1.07 \times 10^6$    | $s^{-1}$            | (1) |
| $k_{5f}$ | $2.29 \times 10^{-1}$ | $mol\,m^{-3}s^{-1}$ | (2) |
| $k_{wf}$ | $2.4 \times 10^{-2}$  | $mol\,m^3s^{-1}$    | (1) |
| $k_{wr}$ | $2.4 \times 10^6$     | $mol^{-1}m^3s^{-1}$ | (1) |

**Supplementary Table 4** |  $h$  parameters used to estimate Sechenov's constant in  $m^3kmol^{-1}$ .

| Constant        | Value     | References |
|-----------------|-----------|------------|
| $h_{K+}$        | 0.0922    | (3)        |
| $h_{OH-}$       | 0.0839    | (3)        |
| $h_{HCO_3-}$    | 0.0967    | (3)        |
| $h_{CO_3^{2-}}$ | 0.1423    | (3)        |
| $h_{CO_2}^0$    | - 0.0172  | (3)        |
| $h_{CO_2}^T$    | - 0.00038 | (3)        |

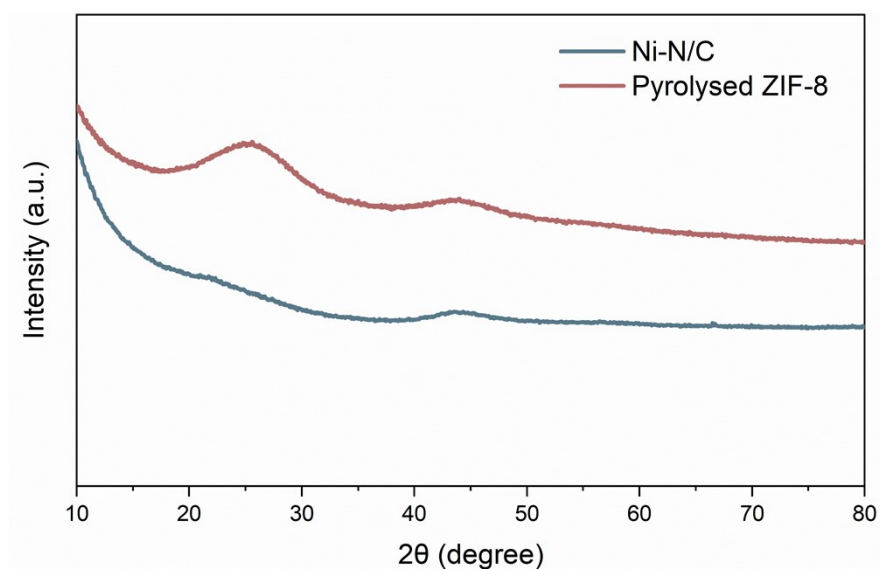

**Supplementary Fig. 1 | XRD spectra of Ni-N/C and pyrolysed ZIF-8.** The Ni-N/C powder sample showed no characteristic peaks associated with Ni or NiO(4). The two broad peaks observed in both powder samples were attributed to carbon planes(5,6).

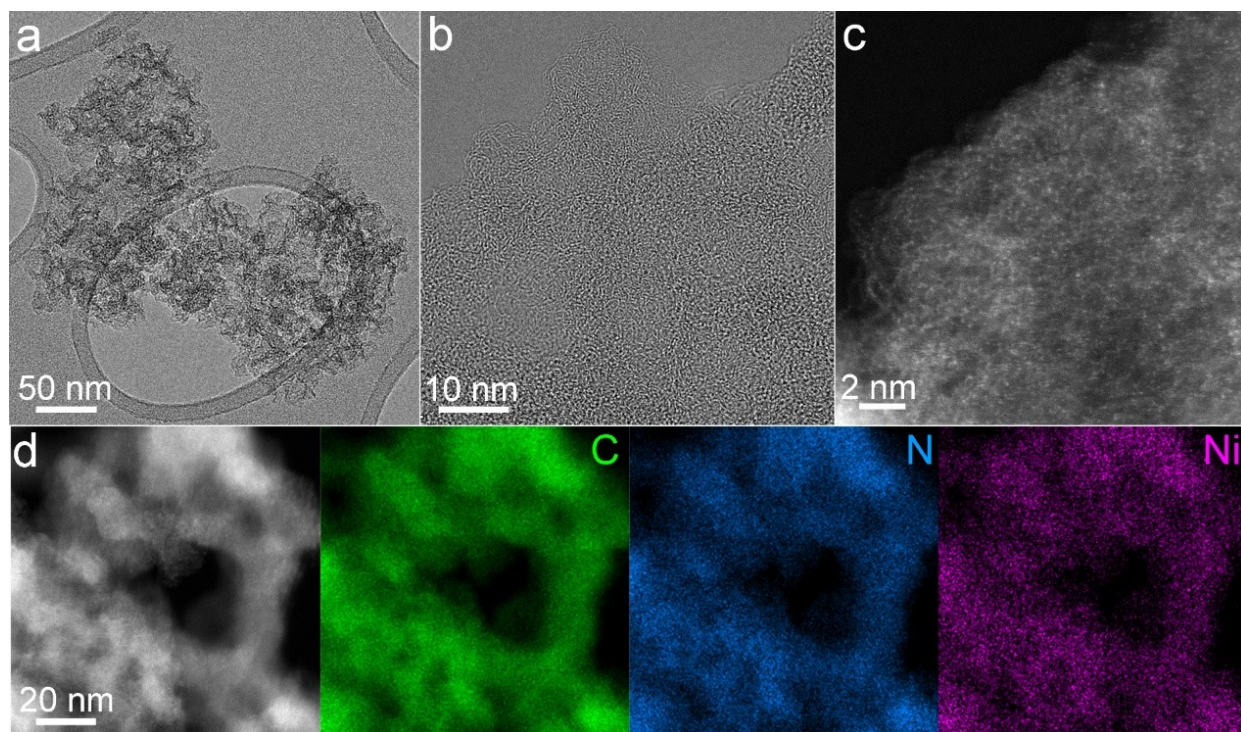

**Supplementary Fig. 2 | Scanning transmission electron microscopy (STEM) images of the Ni-N/C catalyst. a – b, HRTEM images. c, high-magnification HAADF-STEM image of the Ni-N-C catalyst. d, HAADF-STEM image of the Ni-N-C catalyst and corresponding EDS elemental mappings of C, N, and Ni.**

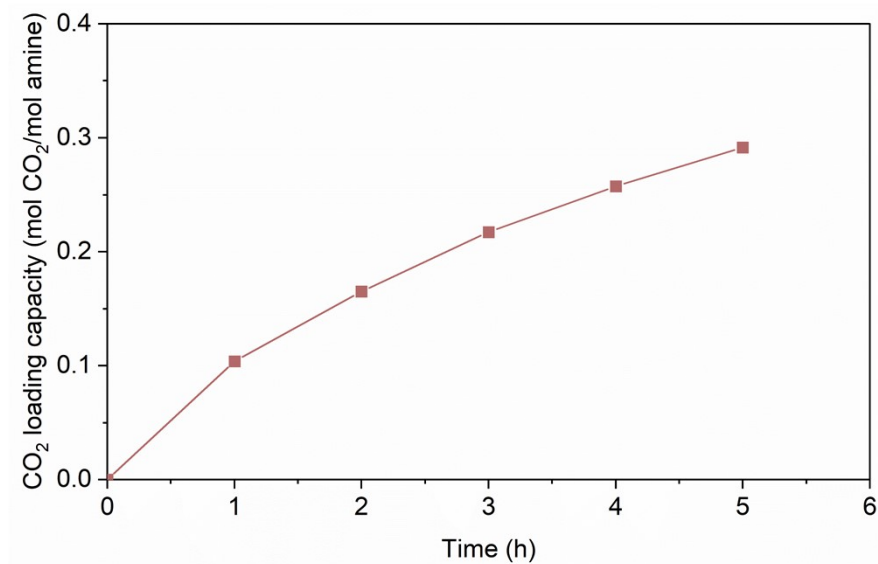

**Supplementary Fig. 3** | Change in CO<sub>2</sub> loading over time during CO<sub>2</sub> absorption of 5 M MDEA.



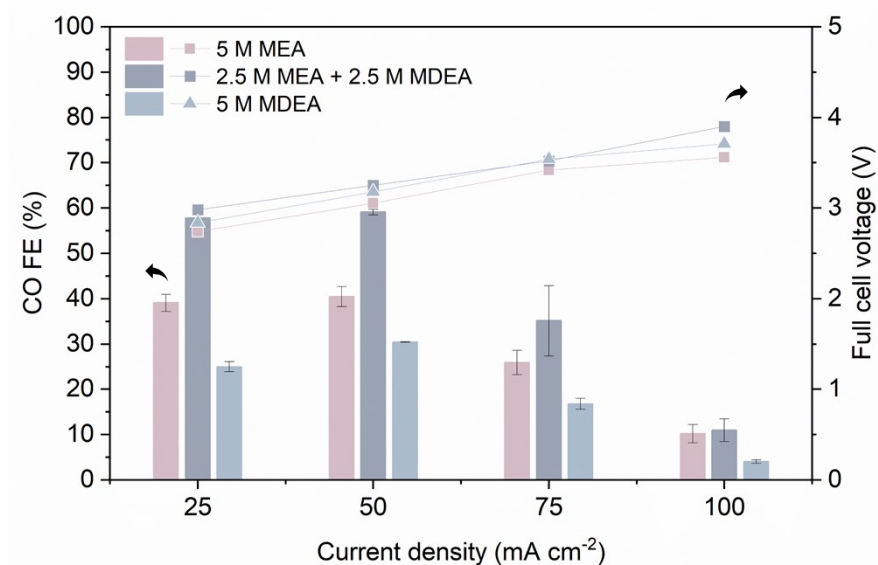

**Supplementary Fig. 4** | FE towards CO and full cell voltage of 5 M MEA, 2.5 M MEA + 2.5 M MDEA, and 5 M MDEA solutions at the  $\text{CO}_2$  loadings of 0.56 mol  $\text{CO}_2$ /mol amine, 0.56 mol  $\text{CO}_2$ /mol amine, and 0.29 mol  $\text{CO}_2$ /mol amine, respectively.

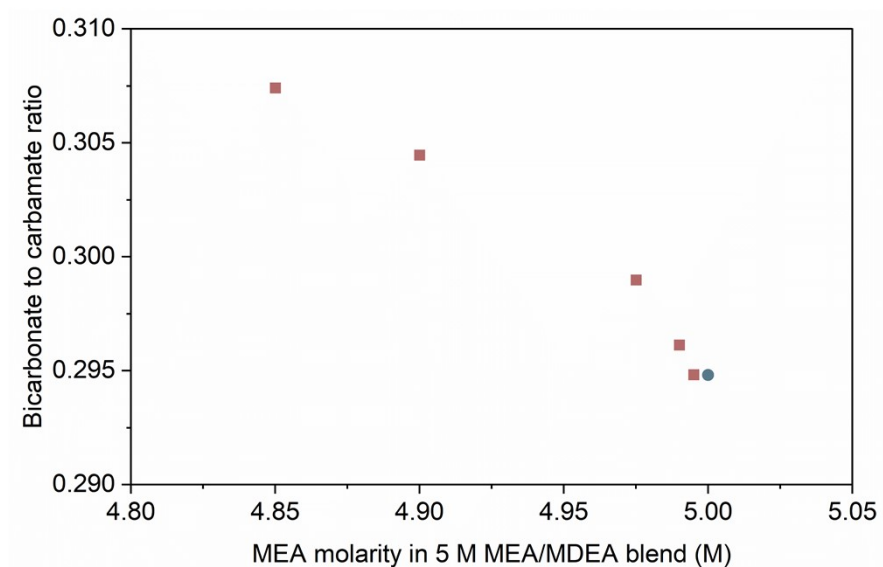

**Supplementary Fig. 5** | Comparison of the bicarbonate-to-carbamate ratio for 5 M MEA and several 5 M MEA/MDEA blends.

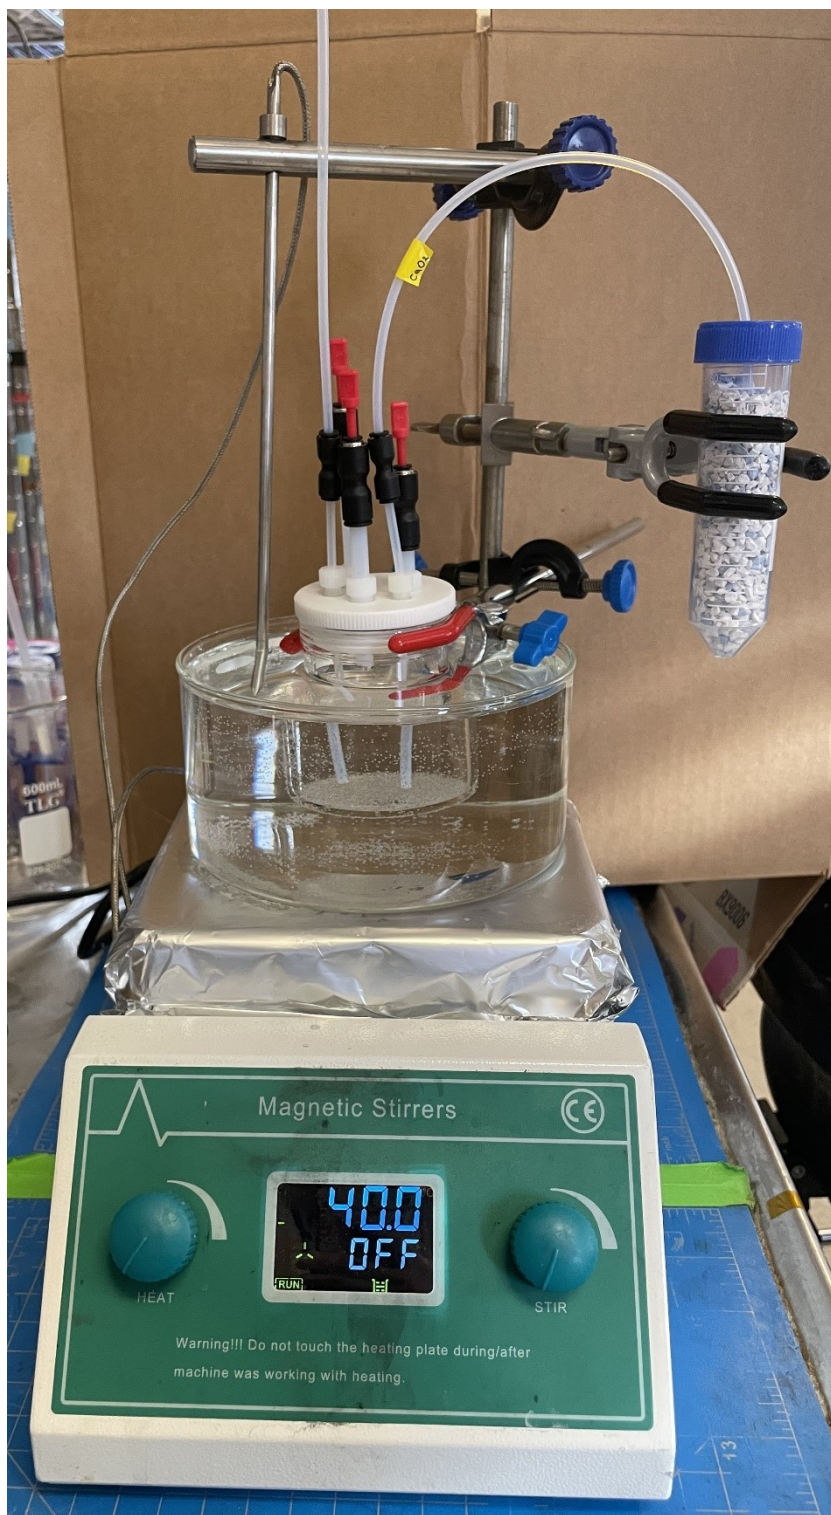

**Supplementary Fig. 6** | Experimental setup for amine-based CO<sub>2</sub> capture under industrial absorption conditions.

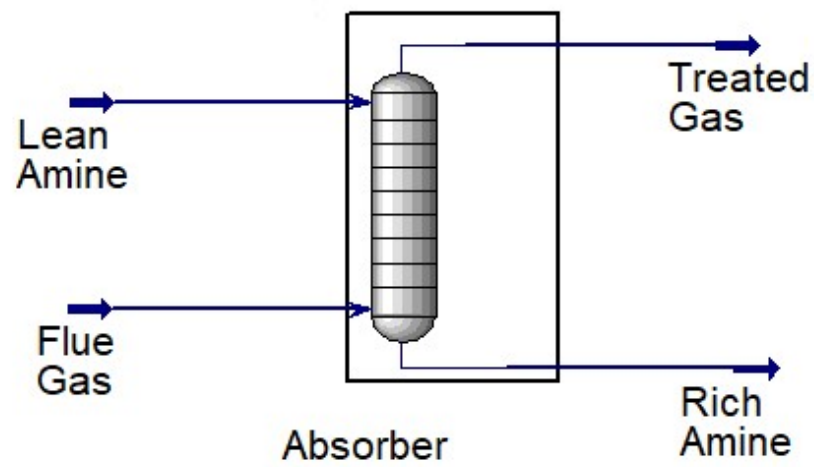

**Supplementary Fig. 7** | Aspen HYSYS model for amine-based CO<sub>2</sub> capture under industrial absorption conditions.

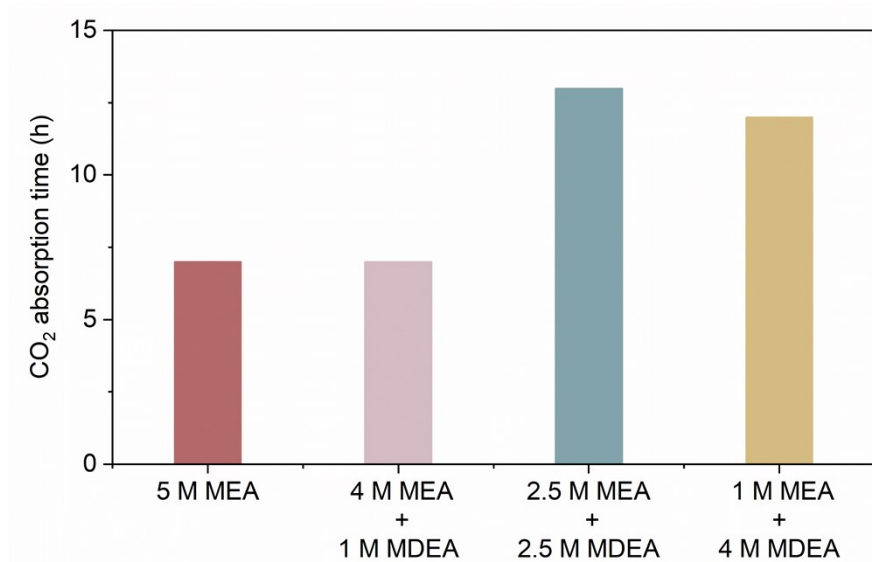

**Supplementary Fig. 8** | Absorption time to reach respective CO<sub>2</sub> loading capacity purging with flue gas stream (15 vol% CO<sub>2</sub> in N<sub>2</sub>) at 40 °C and 1 atm.

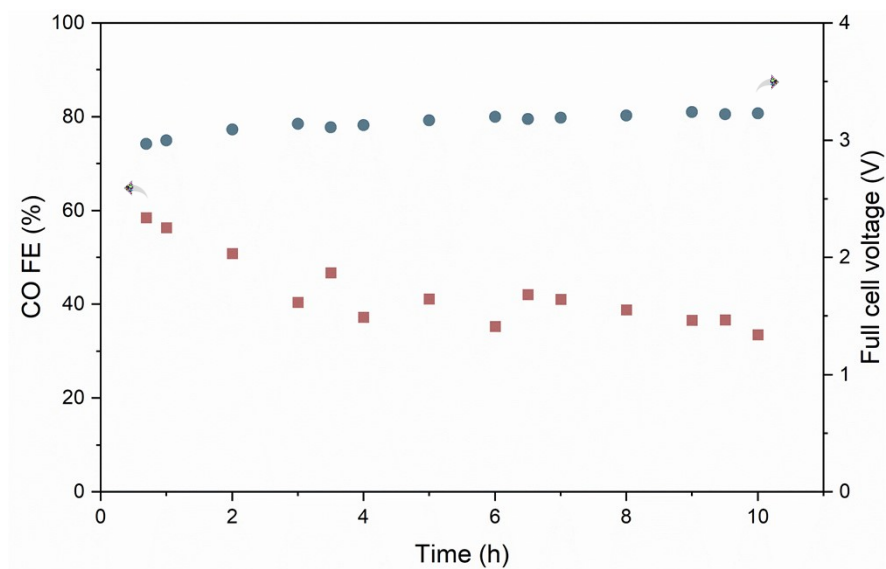

**Supplementary Fig. 9** | Stability test with 4 M MEA + 1 M MDEA solution at its saturated CO<sub>2</sub> loading purged at room temperature and with 100 vol% CO<sub>2</sub> at atmospheric pressure, and electrolytes replaced every 3 h.

**Supplementary Table 5** | Electrolyte conductivity of MEA/MDEA solutions and their series resistances during electrolysis measured using EIS.

|                               | Conductivity (mS/m) | Series Resistance, $R_s$ ( $\Omega$ ) |
|-------------------------------|---------------------|---------------------------------------|
| <b>5 M MEA</b>                | $30.5 \pm 0.03$     | $2.10 \pm 0.01$                       |
| <b>4 M MEA + 1 M MDEA</b>     | $21.4 \pm 0.02$     | $2.45 \pm 0.01$                       |
| <b>2.5 M MEA + 2.5 M MDEA</b> | $11.84 \pm 0.01$    | $3.04 \pm 0.01$                       |
| <b>1 M MEA + 4 M MDEA</b>     | $5.21 \pm 0.01$     | $4.05 \pm 0.01$                       |

**Supplementary Table 6** | Comparison of the electrochemical performance with amine-based reactive CO<sub>2</sub> capture reports.

| Capture solution                                                   | CO FE (%) | Current density (mA cm <sup>-2</sup> ) | $j_{CO}$ (mA cm <sup>-2</sup> ) | Cathode potential (-V vs. RHE) | Full cell potential (V) | CO EE (%)       | Ref. |
|--------------------------------------------------------------------|-----------|----------------------------------------|---------------------------------|--------------------------------|-------------------------|-----------------|------|
| 2 M potassium glycinate (K-GLY) + 0.1 M                            | 44        | 200                                    | 89                              |                                | 3.2                     | 19 <sup>a</sup> | (7)  |
| monopotassium phosphate (KH <sub>2</sub> PO <sub>4</sub> )         | 64        | 50                                     | 32                              |                                | 2.7                     | 31 <sup>a</sup> |      |
| 5 M MEA                                                            | 65        | 50                                     | 32                              |                                |                         |                 | (8)  |
|                                                                    | 78        | 2.6                                    | 2                               | 0.63                           |                         |                 |      |
| 3 M triethylamine (TREA)                                           | 35        | 100                                    | 35                              |                                | 3.5                     | 13              | (9)  |
|                                                                    | 70        | 20                                     | 14                              |                                |                         |                 |      |
| 1 M 2-amino-2-methyl-1-propanol (AMP) + cetrimonium bromide (CTAB) | 91        | 11                                     | 10                              | 0.91                           |                         |                 | (10) |
| 1 M AMP in polycarbonate (PC)                                      | 45        | 15                                     | 7                               | 1.6                            |                         |                 | (11) |
| 5 M MEA + 2 M potassium chloride (KCl)                             | 72        | 50                                     | 36                              | 0.8                            |                         |                 | (12) |
| 0.4 M MDEA-based deep eutectic solvent (DES)                       | 71        | 20                                     | 14                              | 1.1                            |                         |                 | (13) |
| Ethylenediamine (EDA)                                              | 58        | 18.4                                   | 11                              | 0.78                           |                         |                 | (14) |
| 1.25 M 1-cyclohexylpiperidine (CHP)                                | 26        | 104                                    | 27                              |                                | 4.2                     | 8               | (15) |



---

|                |    |     |    |  |     |                      |
|----------------|----|-----|----|--|-----|----------------------|
|                | 39 | 10  | 4  |  | 2.0 | 25                   |
| 3 M Piperazine | 75 | 50  | 38 |  | 2.3 | 44 <sup>b</sup> (16) |
|                | 31 | 100 | 31 |  | 2.2 | 19 <sup>b</sup>      |

---

a. These electrolysis experiments were performed at 40 °C.

b. These electrolysis experiments were performed at 60 °C.

## References

1. Bohra D, Chaudhry JH, Burdyny T, Pidko EA, Smith WA. Modeling the electrical double layer to understand the reaction environment in a CO<sub>2</sub> electrocatalytic system. *Energy Environ Sci* [Internet]. 2019 Oct 1 [cited 2025 Aug 28];12(11):3380–9. Available from: <http://dx.doi.org/10.1039/C9EE02485A>
2. Schulz KG, Riebesell U, Rost B, Thoms S, Zeebe RE. Determination of the rate constants for the carbon dioxide to bicarbonate inter-conversion in pH-buffered seawater systems. *Mar Chem* [Internet]. 2006 Jun 1 [cited 2025 Aug 28];100(1–2):53–65. Available from: <https://www.sciencedirect.com/science/article/pii/S0304420305001684>
3. Weisenberger S, Schumpe A. Estimation of gas solubilities in salt solutions at temperatures from 273 K to 363 K. *AIChE J* [Internet]. 1996 Jan [cited 2025 Aug 28];42(1):298–300. Available from: <https://aiche.onlinelibrary.wiley.com/doi/10.1002/aic.690420130>
4. Richardson JT, Scates R, Twigg M V. X-ray diffraction study of nickel oxide reduction by hydrogen. *Appl Catal A Gen* [Internet]. 2003 Jun 25 [cited 2025 Aug 28];246(1):137–50. Available from: <https://www.sciencedirect.com/science/article/pii/S0926860X02006695>
5. Liu W, Chen Y, Haifeng Q, Zhang L, Yan W, Liu X, et al. A durable nickel single-atom catalyst for hydrogenation reactions and cellulose valorization under harsh conditions. *Angewandte Chemie* [Internet]. 2018 Jun 11 [cited 2025 Aug 28];57(24):7071–5. Available from: <https://onlinelibrary.wiley.com/doi/abs/10.1002/anie.201802231>
6. Yang H, Shang L, Zhang Q, Shi R, Waterhouse GIN, Gu L, et al. A universal ligand mediated method for large scale synthesis of transition metal single atom catalysts. *Nat Commun* [Internet]. 2019 Oct 8 [cited 2025 Aug 28];10(1):4585. Available from: <https://doi.org/10.1038/s41467-019-12510-0>
7. Xiao YC, Sun SS, Zhao Y, Miao RK, Fan M, Lee G, et al. Reactive capture of CO<sub>2</sub> via amino acid. *Nat Commun* [Internet]. 2024 Sep 8 [cited 2025 Aug 28];15:7849. Available from: <https://doi.org/10.1038/s41467-024-51908-3>
8. Kim JH, Jang H, Bak G, Choi W, Yun H, Lee E, et al. The insensitive cation effect on a single atom Ni catalyst allows selective electrochemical conversion of captured CO<sub>2</sub> in universal media. *Energy Environ Sci* [Internet]. 2022 Aug 22 [cited 2025 Aug 28];15(10):4301–12. Available from: <https://pubs.rsc.org/en/content/articlelanding/2022/ee/d2ee01825j>
9. Langie KMG, Tak K, Kim C, Lee HW, Park K, Kim D, et al. Toward economical application of carbon capture and utilization technology with near-zero carbon emission. *Nat Commun* [Internet]. 2022 Dec 5 [cited 2025 Aug 28];13:7482. Available from: <https://doi.org/10.1038/s41467-022-35239-9>

10. Ahmad N, Chen Y, Wang X, Sun P, Bao Y, Xu X. Highly efficient electrochemical upgrade of CO<sub>2</sub> to CO using AMP capture solution as electrolyte. *Renew Energy* [Internet]. 2022 Apr [cited 2025 Aug 28];189:444–53. Available from: <https://www.sciencedirect.com/science/article/pii/S0960148122002804>
11. Pérez-Gallent E, Vankani C, Sánchez-Martínez C, Anastasopol A, Goetheer E. Integrating CO<sub>2</sub> capture with electrochemical conversion using amine-based capture solvents as electrolytes. *Ind Eng Chem Res* [Internet]. 2021 Mar 10 [cited 2025 Aug 28];60(11):4269–78. Available from: <https://doi.org/10.1021/acs.iecr.0c05848>
12. Lee G, Li YC, Kim JY, Peng T, Nam DH, Sedighian Rasouli A, et al. Electrochemical upgrade of CO<sub>2</sub> from amine capture solution. *Nat Energy* [Internet]. 2020 Dec 7 [cited 2025 Aug 28];6:46–53. Available from: <https://www.nature.com/articles/s41560-020-00735-z#author-information>
13. Ahmad N, Wang X, Sun P, Chen Y, Rehman F, Xu J, et al. Electrochemical CO<sub>2</sub> reduction to CO facilitated by MDEA-based deep eutectic solvent in aqueous solution. *Renew Energy* [Internet]. 2021 Nov [cited 2025 Aug 28];177:23–33. Available from: <https://www.sciencedirect.com/science/article/pii/S0960148121007898>
14. Abdinejad M, Mirza Z, Zhang X an, Kraatz H. Enhanced electrocatalytic activity of primary amines for CO<sub>2</sub> reduction using copper electrodes in aqueous solution. *ACS Sustain Chem Eng* [Internet]. 2020 Jan 15 [cited 2025 Aug 28];8(4):1715–20. Available from: <https://doi.org/10.1021/acssuschemeng.9b06837>
15. Diaz LA, Gao N, Adhikari B, Lister TE, Dufek EJ, Wilson AD. Electrochemical production of syngas from CO<sub>2</sub> captured in switchable polarity solvents. *Green Chem* [Internet]. 2017 Dec 14 [cited 2025 Aug 28];20(3):620–6. Available from: <http://dx.doi.org/10.1039/C7GC03069J>
16. Li P, Mao Y, Shin H, Yang Q, Cheng X, Li Y, et al. Tandem amine scrubbing and CO<sub>2</sub> electrolysis via direct piperazine carbamate reduction. *Nat Energy* [Internet]. 2025 Sep 11 [cited 2025 Aug 28];10:1262–73. Available from: <https://doi.org/10.1038/s41560-025-01869-8>
